# Supplementary figures and images for: Potential Role of Lauric Acid in Milk Fat Synthesis in Chinese Holstein Cows Based on Integrated Analysis of Ruminal Microbiome and Metabolome
Source: MDPI journal article supplement (doi:10.3390/ani14101493), 2024-05-17

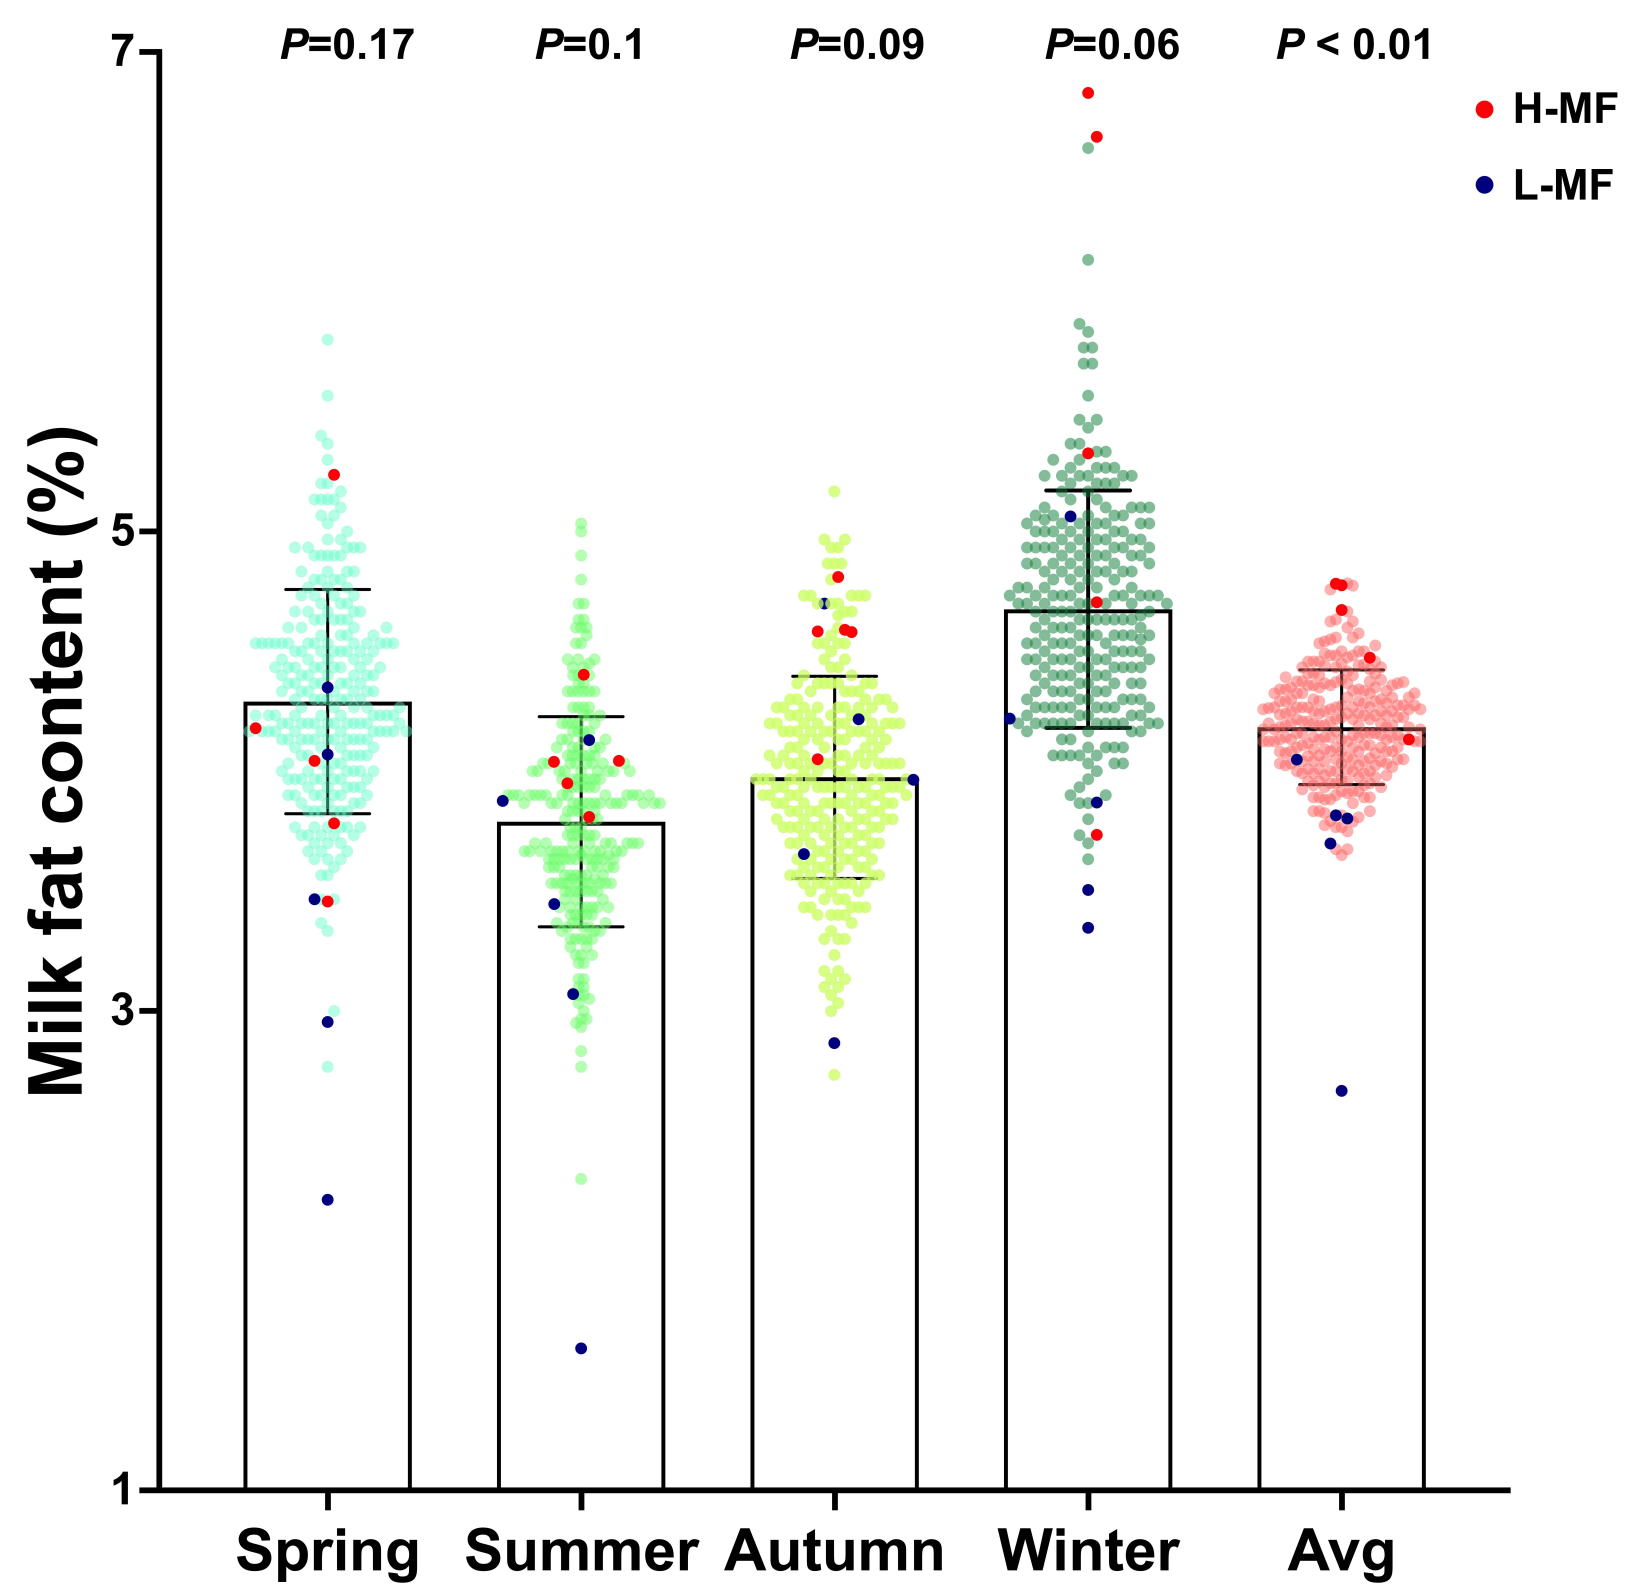

Supplement: s1 [file s1]

# Top 20 of KEGG Enrichment

Pathway

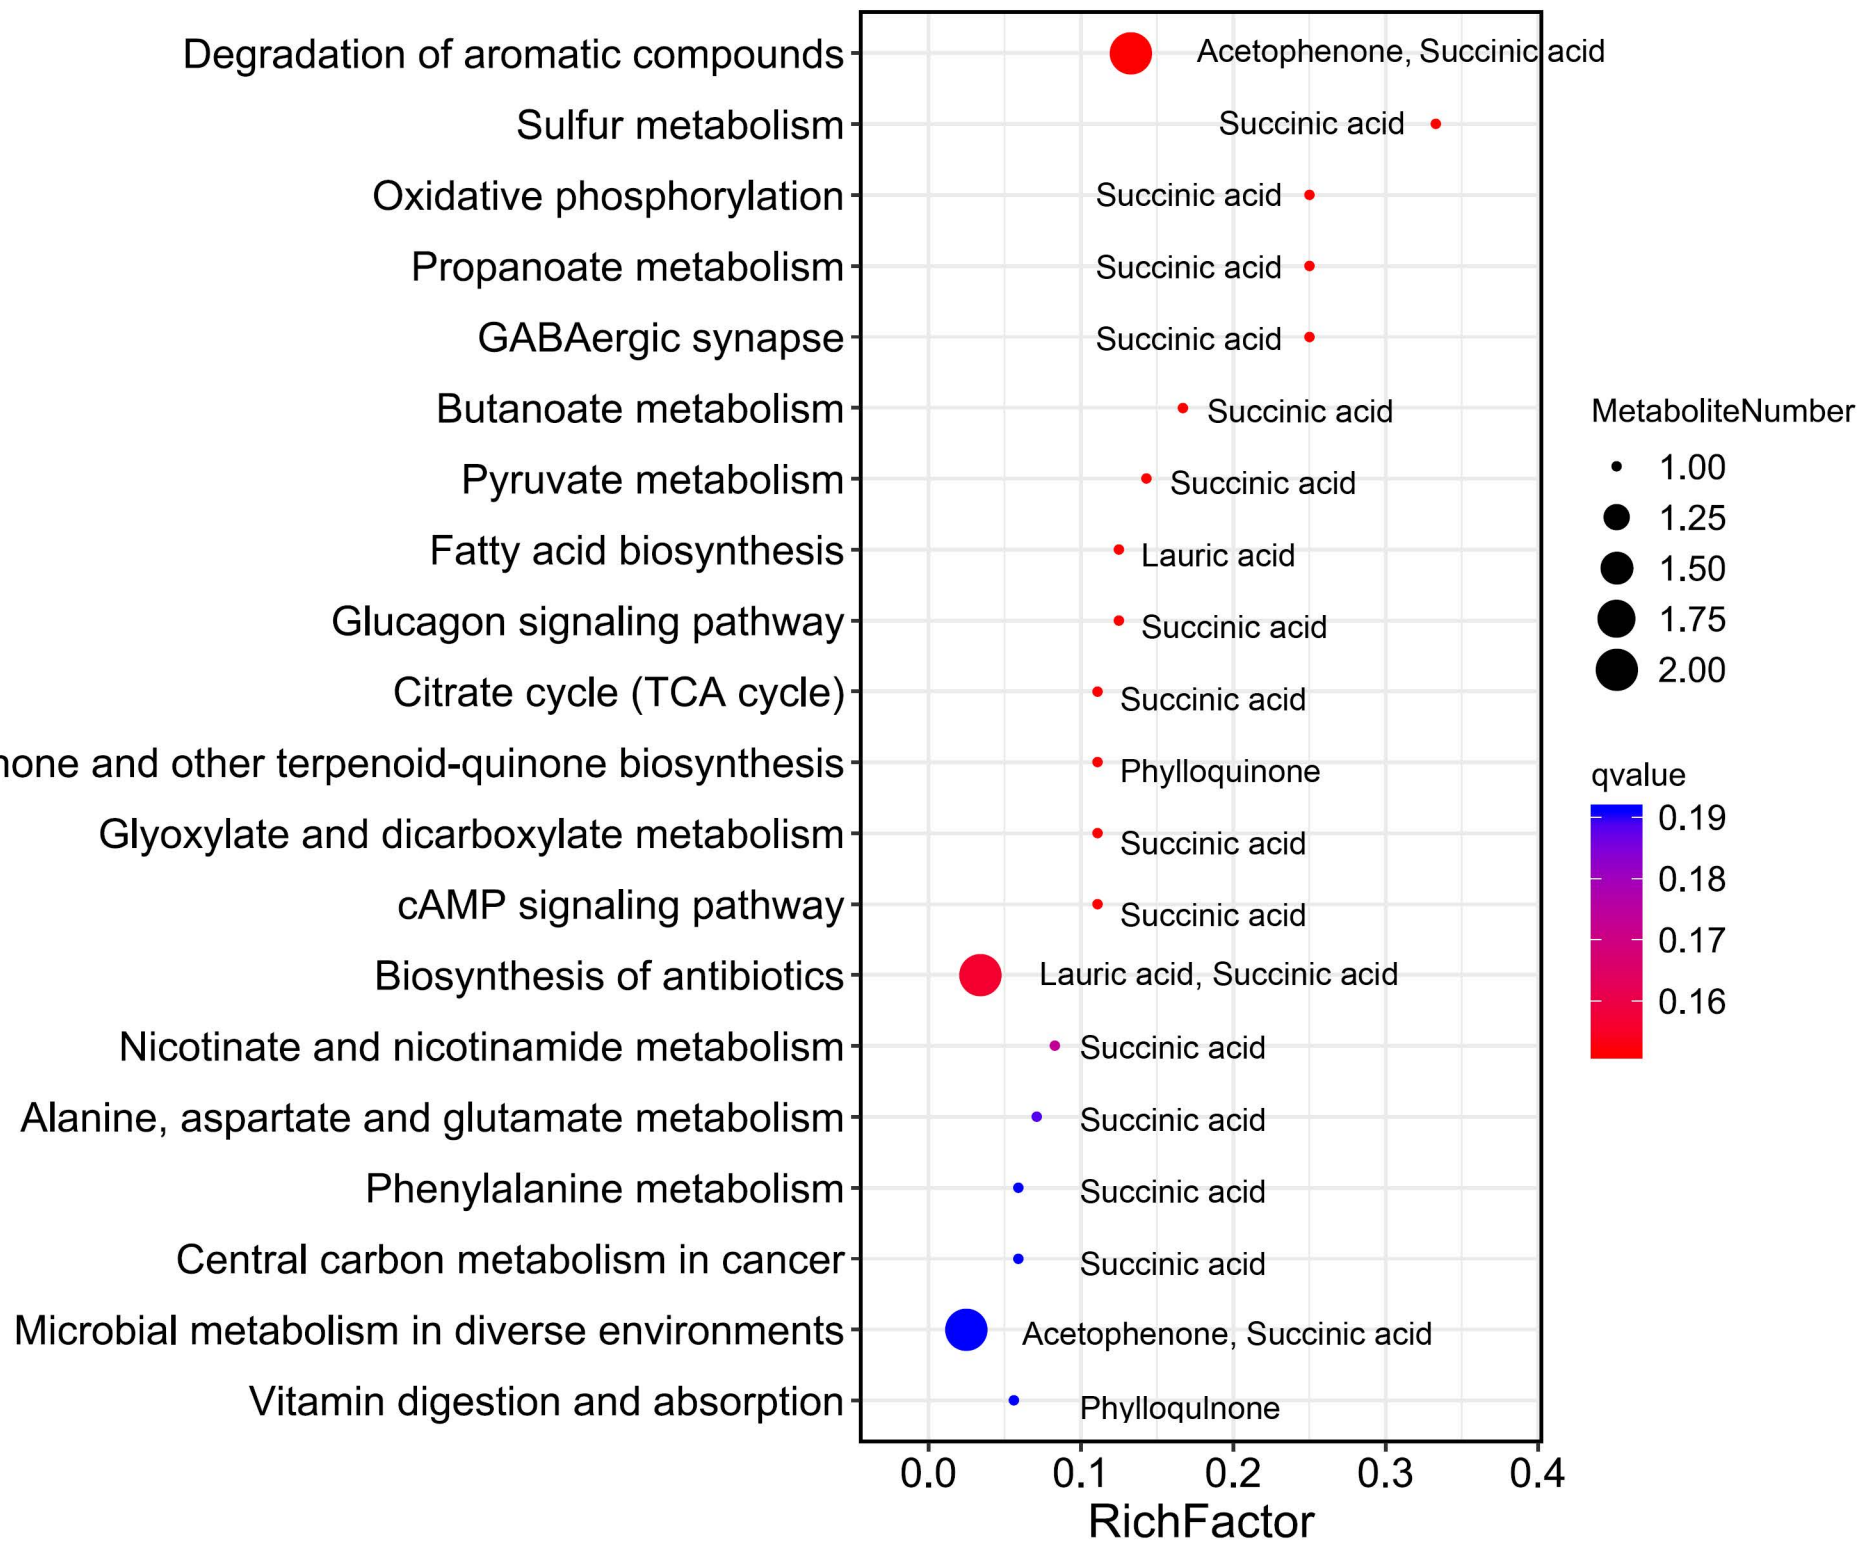

Supplement: s1 [file s1]
